# Supplementary material for: Polymer-free electrospinning of tannic acid and cross-linking in water for hybrid supramolecular nanofibres
Source: Royal Society of Chemistry journal article supplement (doi:10.1039/c8nr01067f), 2018-01-01
Supplement: c8nr01067f1.pdf [file c8nr01067f1.pdf]

## Electronic Supplementary Information (ESI)

### Polymer-free electrospinning of tannic acid and cross-linking in water for hybrid smart supramolecular nanofibres

Manon Allais<sup>a,b</sup>, Domitille Mailley<sup>c</sup>, Pascal Hébraud<sup>d</sup>, Dris Ihiwakrim,<sup>d</sup> Vincent Ball<sup>a,b</sup>, Florent Meyer<sup>a,b</sup>, Anne Hébraud<sup>c</sup>, Guy Schlatter<sup>c,\*</sup>

<sup>a</sup> Institut National de la Santé et de la Recherche Médicale, Unité mixte de Recherche 1121, 11 rue Humann, 67085 Strasbourg Cedex, France

<sup>b</sup> Université de Strasbourg, Faculté de Chirurgie Dentaire, 8 rue Sainte Elisabeth, 67000 Strasbourg, France

<sup>c</sup> Institut de Chimie et Procédés pour l'Energie, l'Environnement et la Santé (ICPEES), ECPM, UMR 7515 du CNRS-Université de Strasbourg, 25 rue Becquerel, 67087 Strasbourg Cedex 02, France

<sup>d</sup> IPCMS, UMR 7504, 23 rue du Loess, 67034 Strasbourg Cedex 02, France

#### Estimation of hydrodynamic diameters $D_{TA}$ of TA aggregates from DLS measurements:

Hydrodynamic diameters  $D_{TA}$  of TA aggregates were calculated from DLS measurements and the following equations:  
Scattering vector  $q$ :

$$q = \frac{4\pi n}{\lambda} \sin\left(\frac{\theta}{2}\right)$$

With  $n$  the refractive index of the solvent,  $\lambda = 633$  nm is the wavelength of the used laser and  $\theta$  the used scattering angle.

Diffusion coefficient:

$$D = \frac{1}{2\tau q^2}$$

With  $\tau$  the characteristic time of the fast mode obtained from DLS measurements. They were obtained from the field correlation functions which were fitted with the stretched exponential functions having one to three relaxation modes. These functions fit well empirically the autocorrelation functions.<sup>1</sup>

The diameter  $D_{TA}$  of TA aggregates are estimated from:

$$D_{TA} = \frac{2k_B T}{6\pi\eta D}$$

With  $k_B = 1,38 \times 10^{-23}$  m<sup>2</sup>.kg.s<sup>-2</sup>.K<sup>-1</sup> the Boltzmann constant,  $T = 298$  K the temperature and  $\eta$  the viscosity of the solvent.

The following parameters were measured to calculate  $D_{TA}$ :

| $C_{TA}$ (wt%) | $\tau$ in water (ms)  | $\tau$ in water/ethanol 37.5/62.5 wt% (ms) |
|----------------|-----------------------|--------------------------------------------|
| 2              | $1.91 \times 10^{-2}$ | $3.53 \times 10^{-2}$                      |
| 10             | $4.89 \times 10^{-2}$ | $1.30 \times 10^{-1}$                      |
| 35             | $1.0 \times 10^{-1}$  | $2.03 \times 10^{-1}$                      |

| Solvent        | water | Water/ethanol 37.5/62.5 wt% |
|----------------|-------|-----------------------------|
| $n$            | 1.332 | 1.36                        |
| $\eta$ (mPa.s) | 0.89  | 2.22                        |

<sup>1</sup> Nisato, G.; Hébraud, P.; Munch, J.-P.; Candau, S. J. *Phys. Rev. E*, 2000, **061**, 02879.

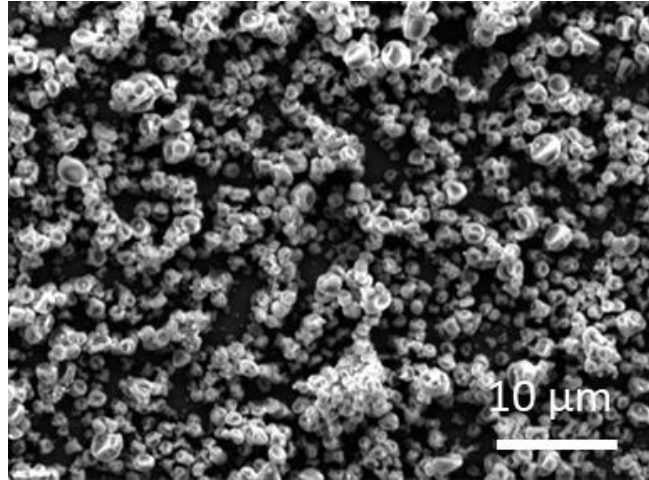

**Figure S1:** Electrospinning of 100 mg/mL of TA in ethanol.

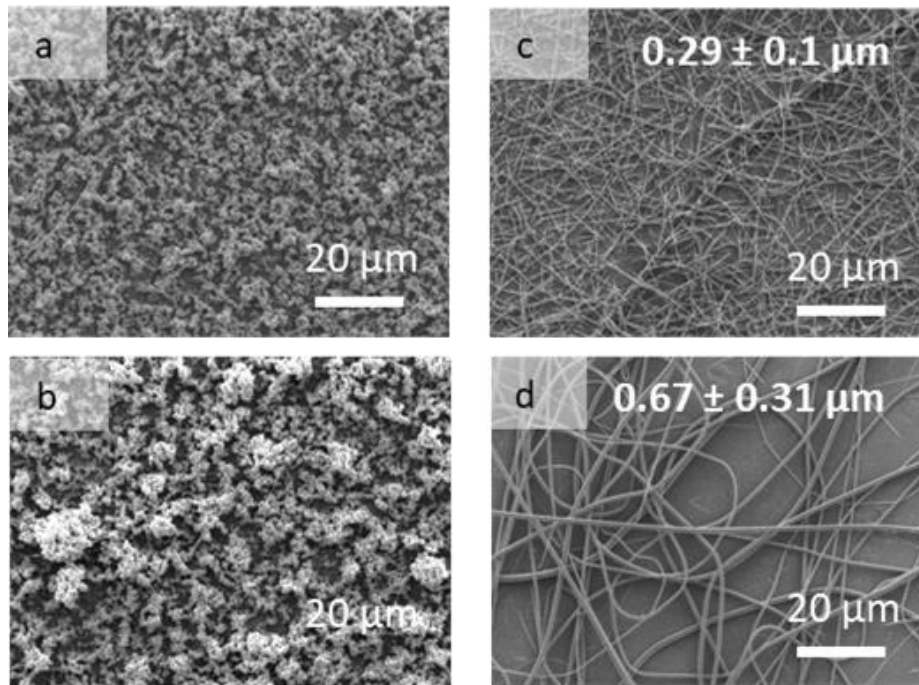

**Figure S2:** SEM images of TA fibers obtained in water-ethanol mixtures (87.5-12.5 wt%) at concentrations of a) 40 wt%, b) 45 wt%, c) 50wt%, d) 55 wt% and their average fiber diameters.

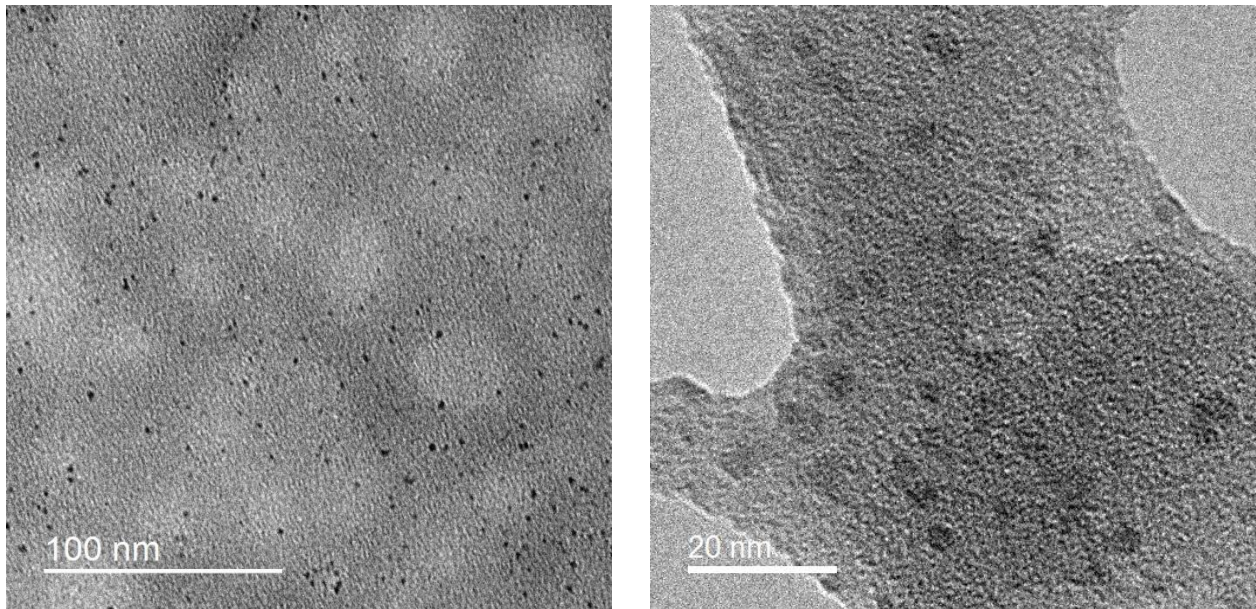

**Figure S3:** Cryo-TEM picture obtained from a TA solution in water-ethanol at 37.5-62.5 wt% and for CTA = 2 wt% showing dark domains of TA aggregates.

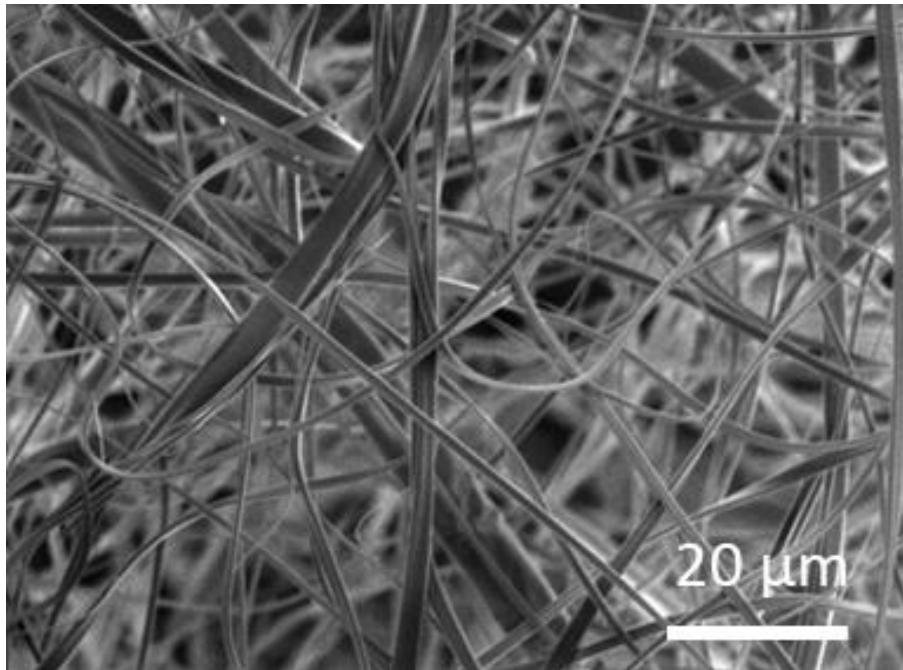

**Figure S4:** SEM picture of the fibres obtained in the water-ethanol mixture 37.5-62.5 wt% at concentration  $C_{TA} = 45$  wt% which were used before cross-linking.

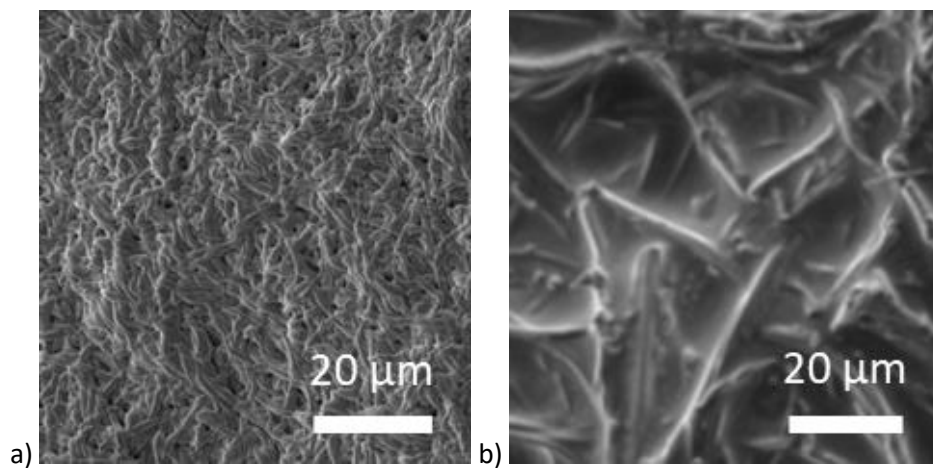

**Figure S5:** SEM picture of the fibres obtained just after crosslinking in aqueous  $\text{NaIO}_4$  solution a) and  $\text{Fe(III)}$  solution b).

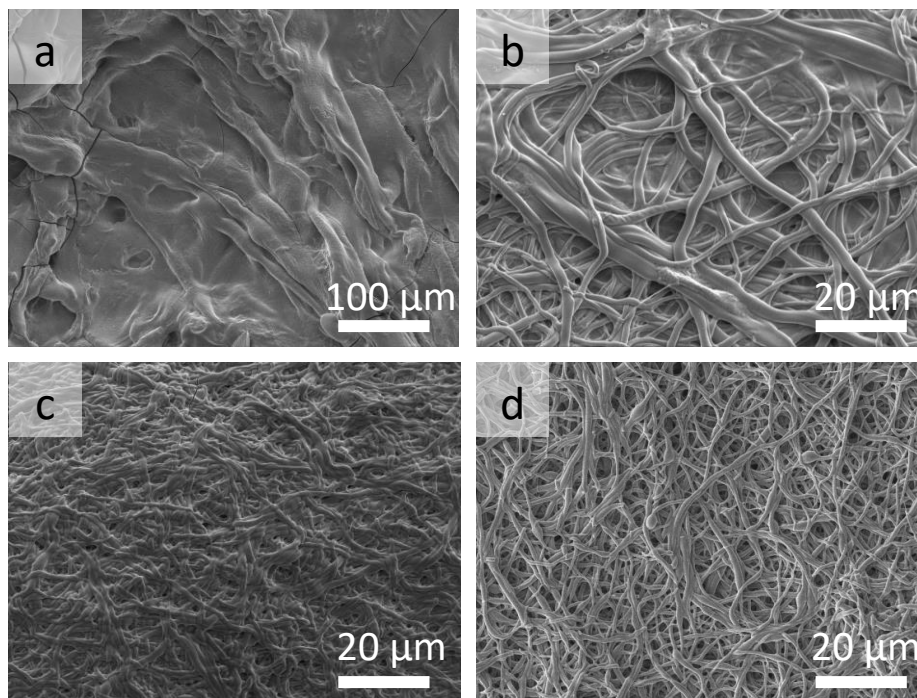

**Figure S6:** SEM picture of the fibres obtained after crosslinking in aqueous  $\text{NaIO}_4$  solution of various concentrations for 10 s followed by washing for 6 hours in distilled water. a) 3 wt%, b) 5 wt%, c) 7 wt%, d) 9 wt%.

| Duration in water | Crosslinking with $\text{Fe}^{3+}$                                                                                                                                                                                                                                                                       | Crosslinking with $\text{NaIO}_4$                                                                                                          |
|-------------------|----------------------------------------------------------------------------------------------------------------------------------------------------------------------------------------------------------------------------------------------------------------------------------------------------------|--------------------------------------------------------------------------------------------------------------------------------------------|
| 1 day             | 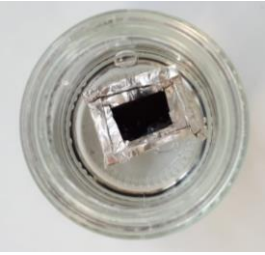 <p>The scaffold is still intact. The scaffold is still intact. The scaffold is black due to oxidation of the galloyl groups by <math>\text{Fe}^{\text{III}}</math> into quinones and formation of covalent bounds.</p> |  <p>The scaffold is still intact</p>                     |
| 3 days            |  <p>The scaffold is still intact</p>                                                                                                                                                                                    |  <p>The scaffold is degrade: a hole appeared (arrow)</p> |
| 7 days            |  <p>The scaffold is still intact</p>                                                                                                                                                                                   | <p>No picture</p> <p>The scaffold is completely degraded</p>                                                                               |

**Figure S7:** Pictures showing the evolution of crosslinked scaffolds after several days in water.

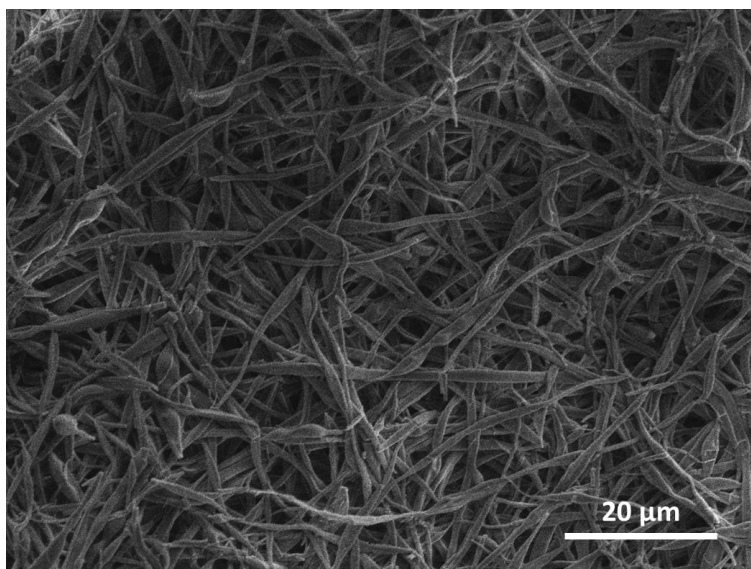

**Figure S8:** SEM picture of the crosslinked fibres with  $\text{Fe}(\text{III})$  after 7 days in water.
